# Supplementary material for: Fabricating multi-scale controllable PEDOT:PSS arrays via templated freezing assembly
Source: Royal Society of Chemistry journal article supplement (doi:10.1039/d3sm01651j), 2024-01-01
Supplement: d3sm01651j2.pdf [file d3sm01651j2.pdf]

# Supporting Information

## **Fabricating Multi-scale Controllable PEDOT:PSS arrays via Templated Freezing Assembly**

Yang Lin,<sup>a b †</sup> Junqiang Mao,<sup>c †</sup> Qingrui Fan<sup>c</sup> and Jianjun Wang<sup>c d \*</sup>

<sup>a</sup> Key Laboratory of Green Printing, Institute of Chemistry, Chinese Academy of Sciences, Beijing 100190, PR China;

<sup>b</sup> School of Chemical Sciences, University of Chinese Academy of Sciences, Beijing 100049, PR China

<sup>c</sup> Technical Institute of Physics and Chemistry, Chinese Academy of Sciences, Beijing 100190, PR China

<sup>d</sup> School of Future Technology, University of Chinese Academy of Sciences, Beijing 100049, PR China

## Contents

- Fig. S1** The optical microscopy image of ice crystal grains
- Fig. S2** Large-area PEDOT:PSS fibers array
- Fig. S3** SEM image of PEDOT:PSS nanowire microstructure
- Fig. S4** The phase diagram of assembly temperature with pattern spacing
- Fig. S5** Optical microscopy images of PEDOT:PSS fibers on template
- Fig. S6** The dark field image of bending PEDOT:PSS arrays
- Fig. S7** The crystallinity of PEDOT:PSS molecules was controlled by adjusting the assembly temperature and time
- Fig. S8** Raman spectra of PEDOT:PSS nanofibers
- Fig. S9** Morphological characterization of PEDOT:PSS nanowires
- Fig. S10** PDMS film with PEDOT:PSS bend pattern in different strain

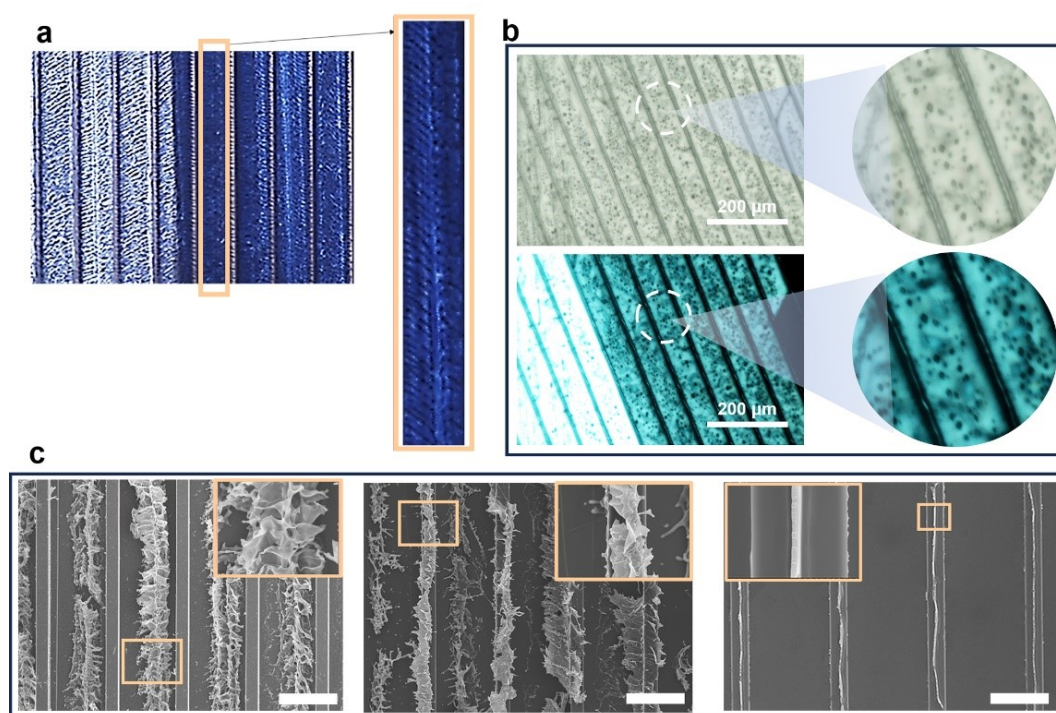

**Fig. S1** The optical microscopy image of ice crystal grains. **(a)** The image of tiny ice crystal grains after freezing vertically. **(b)** The image of long-strip ice crystal on template, where the PEDOT:PSS fibers were in situ assembled between unidirectional ice crystal arrays, and obvious birefringence was observed in situ by polarized optical microscopy images. **(c)** SEM images of PEDOT:PSS migrating on the template surface during freezing assembly process. All scale bars were 40 μm.

The preparation of SEM images of PEDOT:PSS migrating on the template surface during freezing assembly process. First, vertical freezing of suspension along the direction of template on the pre-cooled (-40 °C) cryo-stage, the PEDOT:PSS was located in the middle of the template groove. Second, increasing the annealing temperature (range from -3 °C to -9 °C) the PEDOT:PSS was migrating to the template upper surface boundaries. Last, extending assembly time, the PEDOT:PSS was located on the template surface.

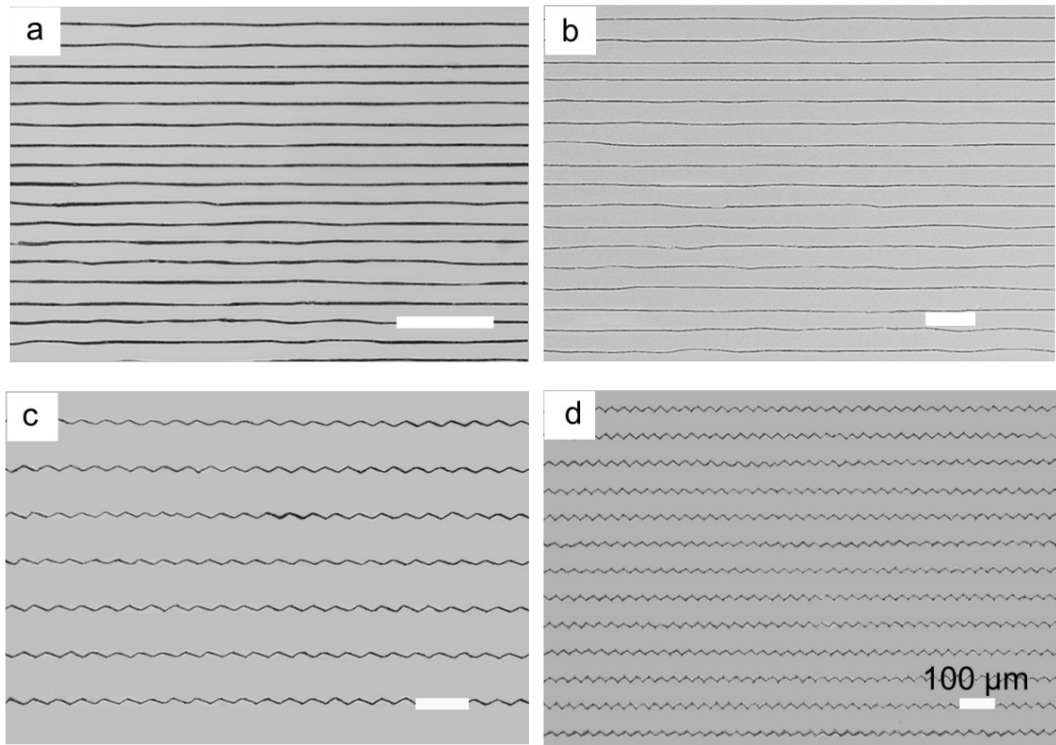

**Fig. S2** Large-area PEDOT:PSS fibers array. **(a-b)** Linear nanofibers array ( $L = 20 \mu\text{m}$  and  $50 \mu\text{m}$ ). **(c-d)** Bending arrays ( $\theta = 120^\circ$ ,  $L = 90 \mu\text{m}$ ,  $120 \mu\text{m}$ ); ( $\theta = 90^\circ$ ,  $L = 80 \mu\text{m}$ ,  $110 \mu\text{m}$ ). All scale bars were  $100 \mu\text{m}$ .

Preparation condition of PEDOT:PSS nanofiber. First, vertical freezing of suspension along the direction of template on the pre-cooled ( $-40^\circ\text{C}$ ) cryo-stage. Second, increasing the annealing temperature. **(a-b)**  $L = 20 \mu\text{m}$  and  $50 \mu\text{m}$ , annealing temperature range from  $-3^\circ\text{C}$  to  $-5^\circ\text{C}$ , extending assembly time more than 1 h. **(c-d)** Bending arrays ( $\theta = 120^\circ$ ,  $L = 90 \mu\text{m}$ ,  $120 \mu\text{m}$ ); ( $\theta = 90^\circ$ ,  $L = 80 \mu\text{m}$ ,  $110 \mu\text{m}$ ), annealing temperature was  $-3^\circ\text{C}$ , extending assembly time more than 1 h, the tiny ice crystal grains annealed into large single crystal, Last, removes single crystal ice the PEDOT:PSS fibers array was obtained.

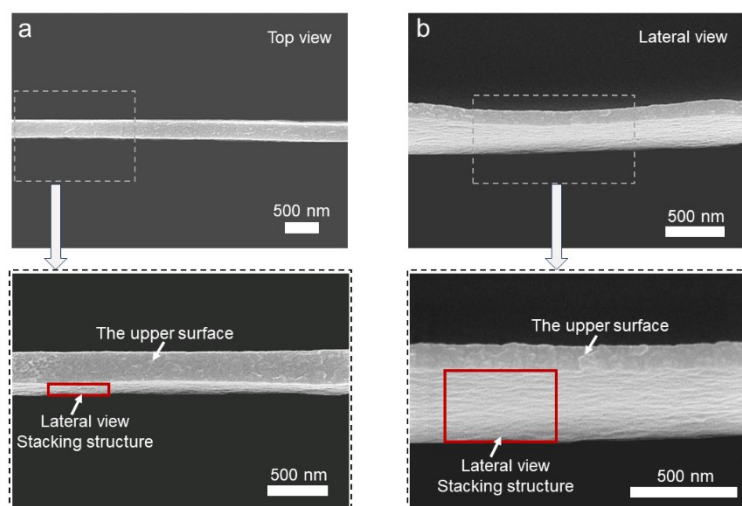

**Fig. S3** SEM image of PEDOT:PSS nanowire microstructure. **(a)** The PEDOT:PSS nanowire was rotated 30° clockwise. **(b)** The PEDOT:PSS nanowire was rotated 60° clockwise. The lateral view indicate that the interior of the nanowire was layer-by-layer stacked structure.

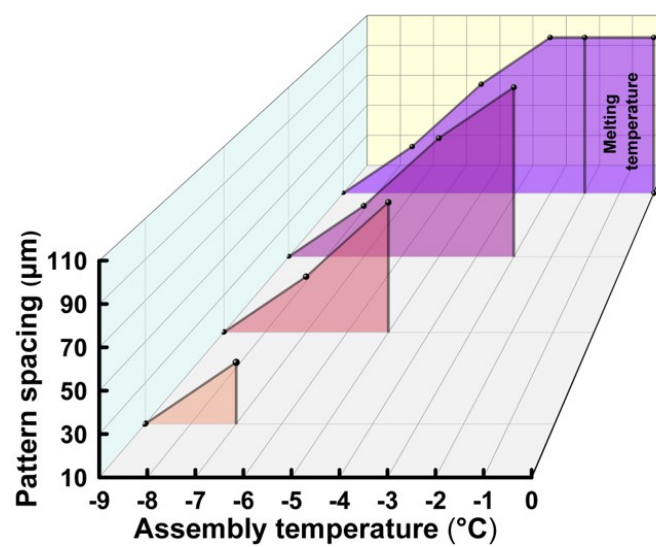

**Fig. S4** The phase diagram shows the correlation of assembly temperature with pattern spacing.

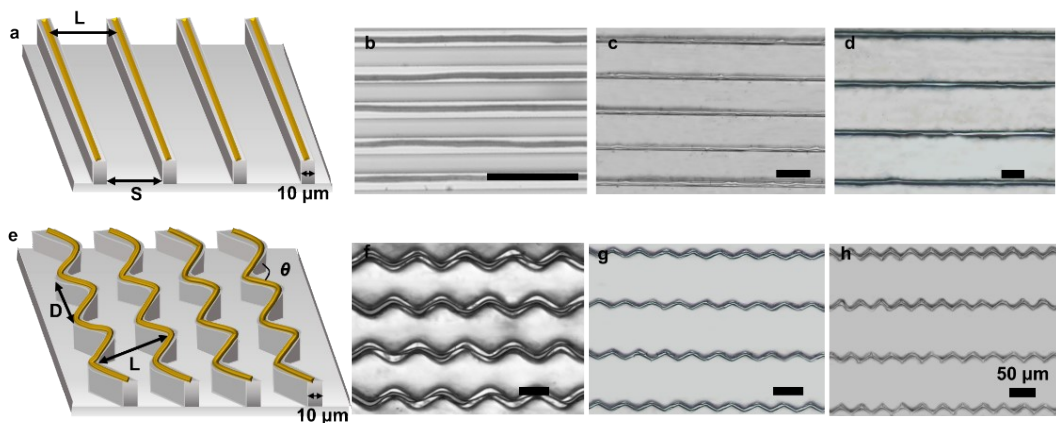

**Fig. S5** Optical microscopy images of PEDOT:PSS fibers assembled on upper surface of template. **(a)** Scheme of PEDOT:PSS fibers on linear patterned template. **(b-d)** PEDOT:PSS fibers were assembled on upper surface of template, with the line interval ( $L$ ) of 20  $\mu\text{m}$ , 50  $\mu\text{m}$ , and 110  $\mu\text{m}$  respectively. **(e)** Scheme of PEDOT:PSS fibers on bending patterned template. **(f-h)** Various bending nanowires on bending template. The  $\theta = 120^\circ$  for (f) and (g),  $\theta = 90^\circ$  for (h). All scale bars were 50  $\mu\text{m}$ .

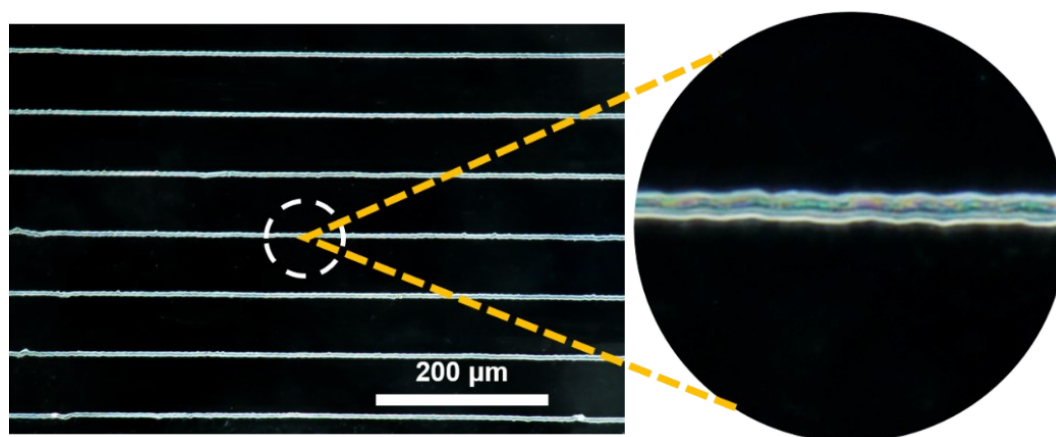

**Fig. S6** The dark field image of bending PEDOT:PSS arrays with small angle indicated the freezing assembly strategy can achieve fine control on the micro-morphology of PEDOT:PSS fibers.

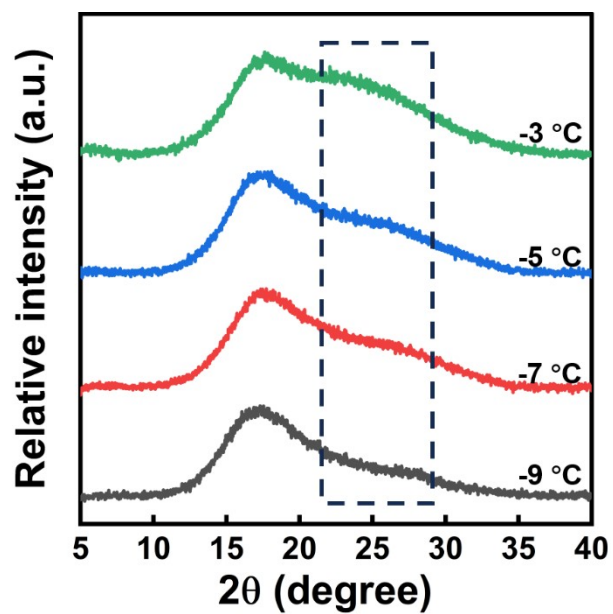

**Fig. S7** XRD diffraction pattern of PEDOT:PSS assembled at different temperature (-3 °C, -5 °C, -7 °C, -9 °C) annealing for 48h. The higher assembly temperature results in stronger intensity at  $2\theta = 25.6^\circ$ .

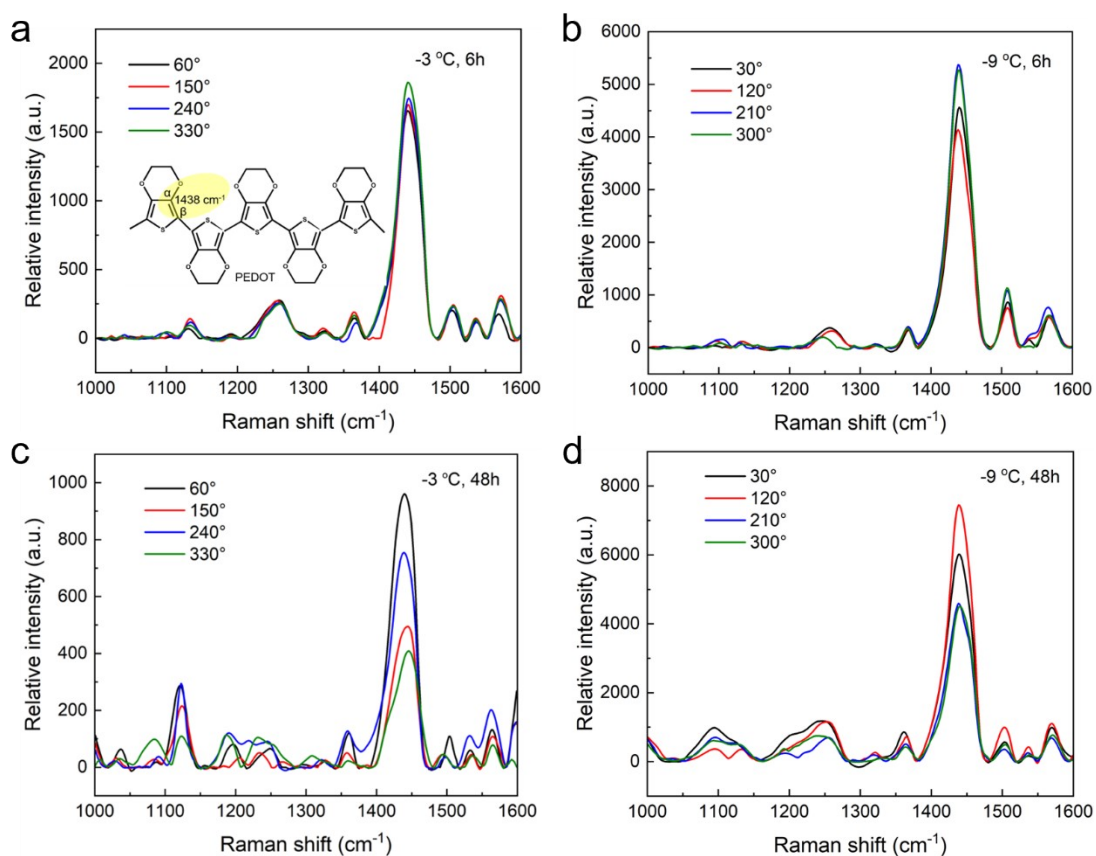

**Fig. S8** (a-b) Raman spectra of PEDOT:PSS nanofibers assembled at -3 °C and -9 °C for 6 h in different polarized degrees. The peak of 1438 cm<sup>-1</sup> was attributed to double-bond stretching vibration of C<sub>α</sub>=C<sub>β</sub>(-O). (c-d) Raman spectra of PEDOT:PSS annealed at -3 °C and -9 °C for 48 h at diverse polarized degrees.

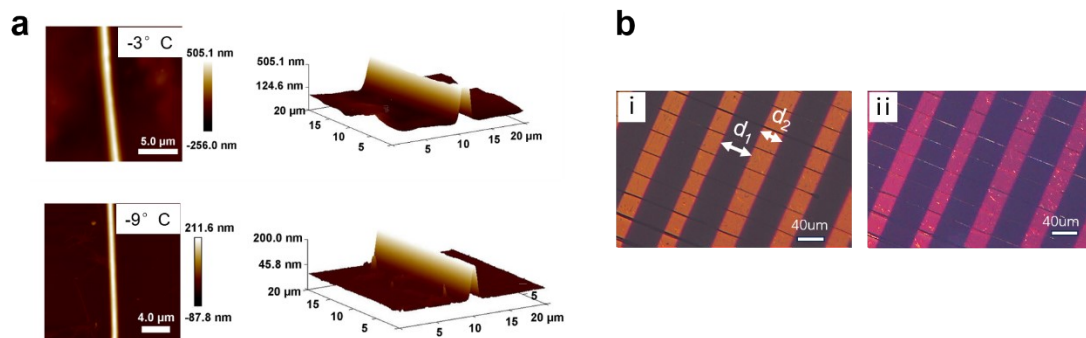

**Fig. S9** Morphological characterization of PEDOT:PSS nanowires. **(a)** AFM image of PEDOT:PSS nanowires assembled at -3 °C and -9 °C, respectively. **(b)** Optical microscopy image of PEDOT:PSS pattern arrays coated with Au electrode (i) (  $d_1$  was the distance between two adjacent Au electrodes;  $d_2$  was width of Au electrode ) and in situ polarized optical microscopy image of PEDOT:PSS pattern arrays (ii) .

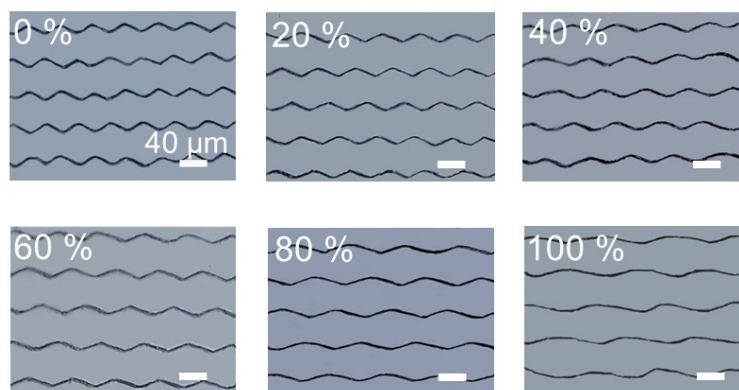

**Fig. S10** PDMS film with PEDOT:PSS bend pattern in different strain (0%, 20%, 40%, 60%, 80%,100%). All scale bars were 40  $\mu\text{m}$ .
